# Supplementary material for: Hypermethylation of the Gene Coding for PGC-1α in Peripheral Blood Leukocytes of Patients With Parkinson’s Disease
Source: PubMed Central journal article supplement (PMC7054441; doi:10.3389/fnins.2020.00097), 2020-02-26
Supplement: Table_1.pdf [file Table_1.pdf]

## *Supplementary Material*

### Supplementary Table 1

Summary of the primers used for the analysis of the gene polymorphism.

| Gene     | SNP       | First PCR prime (5'-3')             | Second PCR prime (5'-3')           | UEP SEQ (5'-3')             |
|----------|-----------|-------------------------------------|------------------------------------|-----------------------------|
|          | rs2970848 | ACGTTGGATGAACCCTCCCTTAT<br>GTTGTGC  | ACGTTGGATGCTGCAACAGAAA<br>CCTAAGTG | GGTCGGCTGGCACTG             |
| PPARGC1A | rs2970870 | ACGTTGGATGAAAACAATCCCC<br>CAGTTACC  | ACGTTGGATGGGAGATGGACAA<br>TGAAGAAC | TCCCCCAGTTACCTAAAT<br>ATA   |
|          | rs6821591 | ACGTTGGATGCGAACATTTTGA<br>AGTTCTAGG | ACGTTGGATGCAGAATGCGCAA<br>GGGCAAAC | ATTTTGAAGTTCTAGGTTT<br>TAAG |
